# Supplementary material
Source: MDPI journal article supplement (https://www.mdpi.com/2227-9717/9/6/924)
Supplement: s1 [file s1]

# Supplementary Materials: Solubility Temperature Dependence of Bio-Based Levulinic Acid, Furfural and Hydroxymethylfurfural in Water, Nonpolar, Polar Aprotic and Protic Solvents

Ana Jakob <sup>1</sup>, Miha Grilc <sup>1</sup>, Janvit Teržan <sup>1</sup> and Blaž Likozar <sup>1,2,3\*</sup>

<sup>1</sup> Department of Catalysis and Chemical Reaction Engineering, National Institute of Chemistry, Hajdrihova 19, 1000 Ljubljana, Slovenia; ana.jakob@ki.si (A.J.); miha.grilc@ki.si (M.G.); janvit.terzan@ki.si (J.T.)

<sup>2</sup> Pulp and Paper Institute, Bogišičeva 8, 1000 Ljubljana, Slovenia

<sup>3</sup> Faculty of Polymer Technology, Ozare 19, 2380 Slovenj Gradec, Slovenia

\* Correspondence: blaz.likozar@ki.si; Tel.: +386-1-476-0-281

## Abbreviations:

|      |                       |
|------|-----------------------|
| FF   | Furfural              |
| LA   | Levulinic acid        |
| HMF  | Hydroxymethylfurfural |
| DMSO | Dimethyl sulfoxide    |

The units for all below tables:

A (/); B (L g<sup>-1</sup>); c (g L<sup>-1</sup>); Solubility (g L<sup>-1</sup>)

The protocol for the assessment of solubility was as follows:

- 1.) Into 4 separate 5 mL vials 60, 150, 300, in 600 mg of the appropriate solute was weighed.
- 2.) To this solute 3 mL of the appropriate solvent was added (a calibrated 5 mL pipet was used).
- 3.) The solution was left to rest for 30 min, so that the solute completely dissolved.
- 4.) The FTIR probe was submerged in pure solvent and the background was equilibrated for 3 min.
- 5.) The probe was cleaned thoroughly and submerged into the vial with the lowest amount of added solute.
- 6.) After the FTIR signal was stable, the probe was removed, cleaned again and submerged into the next vial with the higher amount of solute.
- 7.) This was done for all solutes in all solvents, at all temperatures (where the solvent was liquid).
- 8.) From some vials 100 µL of the solution was taken and diluted (10-times) in 900 µL of the appropriate solvent.
- 9.) The diluted solution prepared in the previous line was analyzed with GC/MS to validate the check the actual concentration of solute.

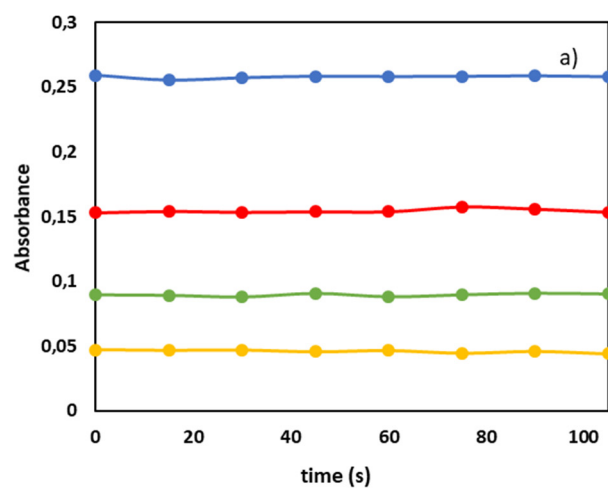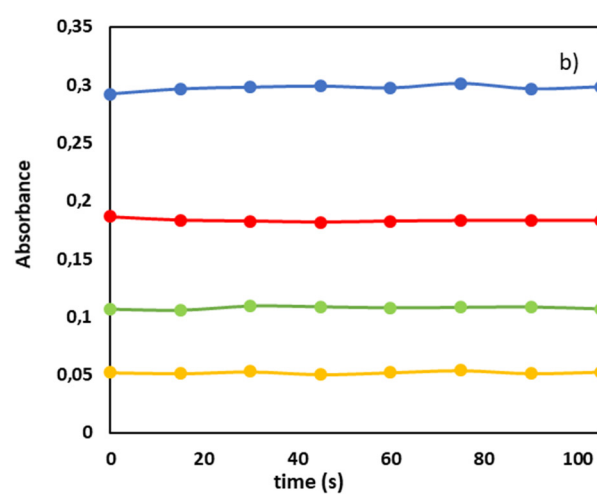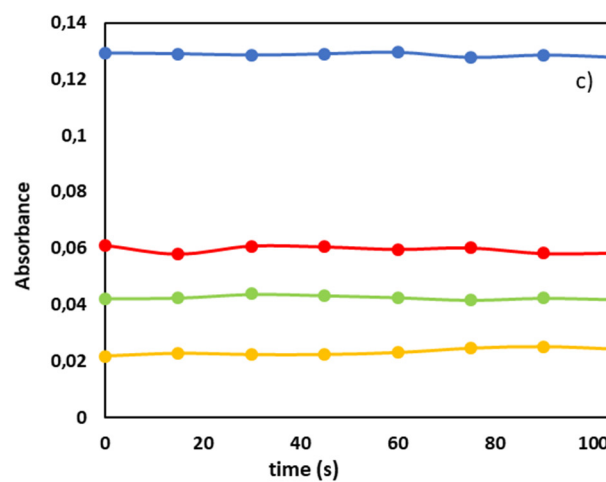

**Figure S1.** Dependence of the signal intensity versus time for furfural (a), levulinic acid (b) and HMF (c) in methanol at 25 °C, —20 g L<sup>-1</sup>, —50 g L<sup>-1</sup>, —100 g L<sup>-1</sup>, —200 g L<sup>-1</sup>.

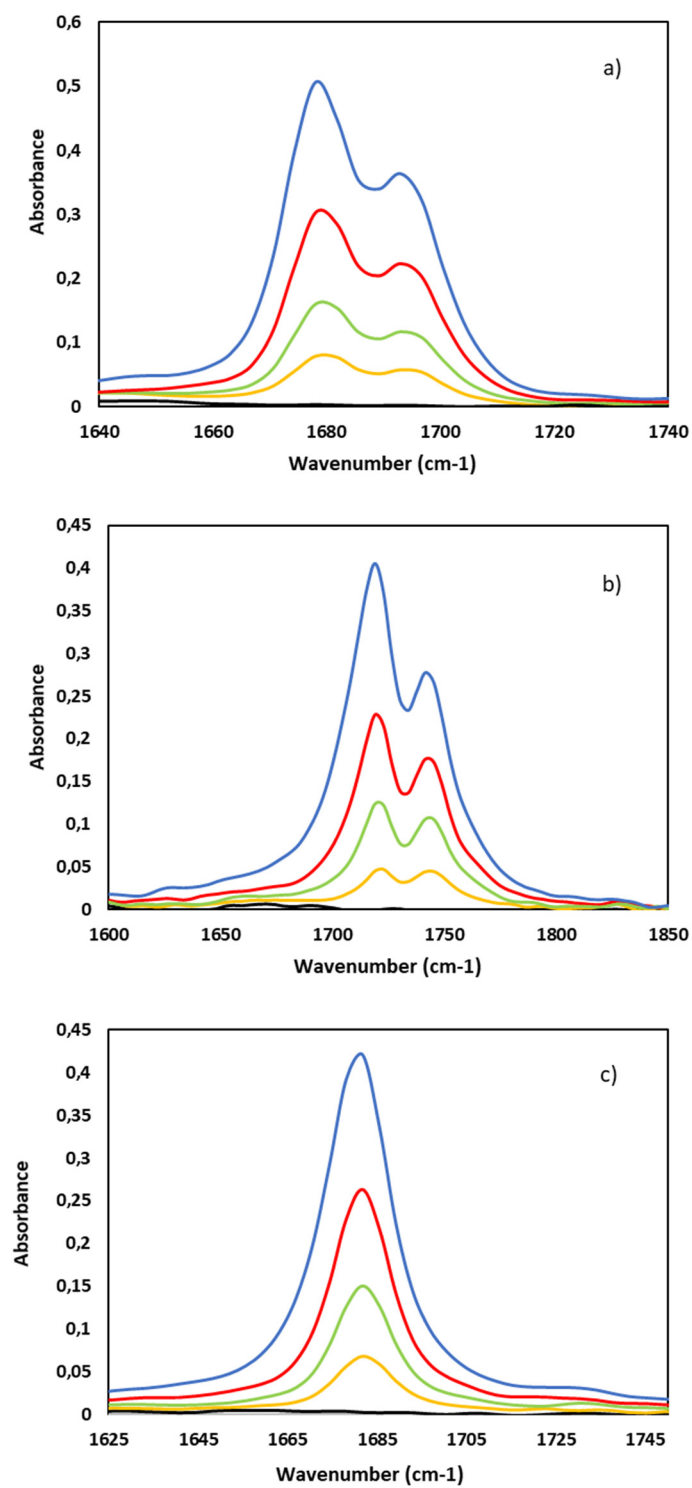

**Figure S2.** Absorbance of furfural (a), levulinic acid (b) and HMF (c) in acetonitrile at 25 °C; – (acetonitrile), –20 g L<sup>-1</sup>, –50 g L<sup>-1</sup>, –100 g L<sup>-1</sup>, –200 g L<sup>-1</sup>.

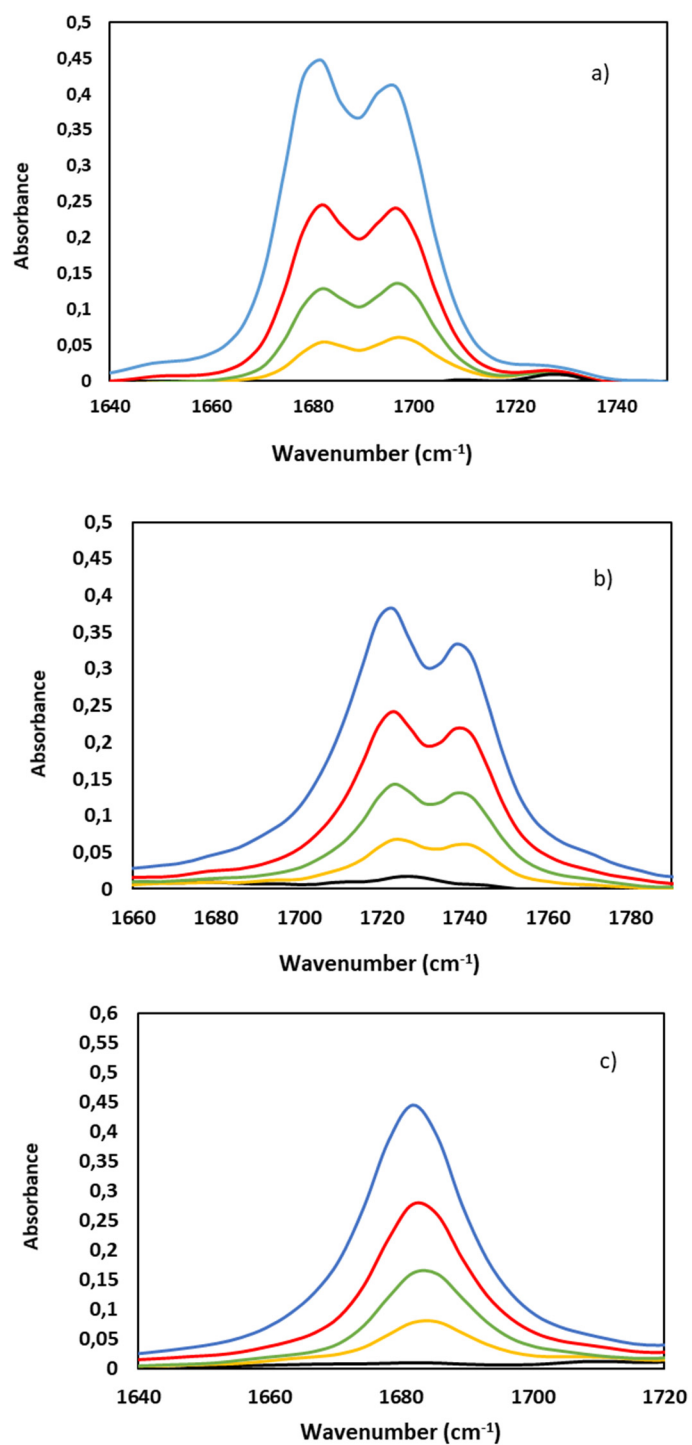

**Figure S3.** Absorbance of furfural (a), levulinic acid (b) and HMF (c) in 1,4-dioxane at 25 °C; – (1,4-dioxane), –20  $\text{g L}^{-1}$ , –50  $\text{g L}^{-1}$ , –100  $\text{g L}^{-1}$ , –200  $\text{g L}^{-1}$ .

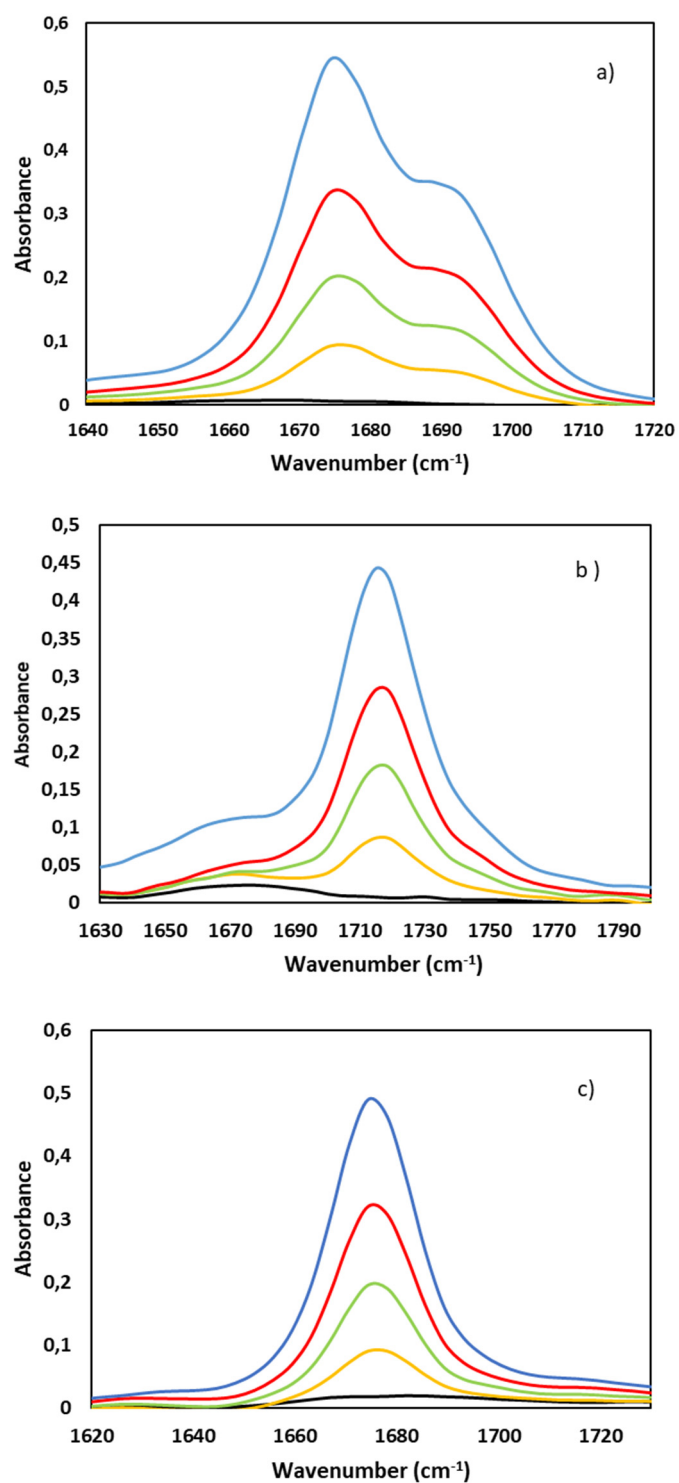

**Figure S4.** Absorbance of furfural (a), levulinic acid (b) and HMF (c) in DMSO at 25 °C; – (DMSO), –20 g L<sup>-1</sup>, –50 g L<sup>-1</sup>, –100 g L<sup>-1</sup>, –200 g L<sup>-1</sup>.

**Table S1.** The table contains some basic information for the three examined compounds and the selected solvents.

|                                     | Molecular<br>Formula                                         | Molecular<br>Mass (g<br>mol <sup>-1</sup> ) | C | H  | O | N | Cl | S | Polarity<br>Index [1] | Dipole<br>Moment<br>(D) | DielecTric<br>Constant |
|-------------------------------------|--------------------------------------------------------------|---------------------------------------------|---|----|---|---|----|---|-----------------------|-------------------------|------------------------|
| Levulinic<br>acid                   | C <sub>5</sub> H <sub>8</sub> O <sub>3</sub>                 | 116.11                                      | 5 | 8  | 3 | / | /  | / |                       | 6.1                     | 19.1                   |
| Furfural                            | C <sub>5</sub> H <sub>4</sub> O <sub>2</sub>                 | 96.08                                       | 5 | 4  | 2 | / | /  | / | 0.4                   | 8.3                     | 41.8                   |
| Hy-<br>droxymet<br>hylfurfu-<br>ral | C <sub>6</sub> H <sub>6</sub> O <sub>3</sub>                 | 126.11                                      | 6 | 6  | 3 | / | /  | / |                       | 5.0                     |                        |
| <i>n</i> -Hexane                    | C <sub>6</sub> H <sub>14</sub>                               | 86.18                                       | 6 | 14 | / | / | /  | / | 0.1                   | 0.0                     | 2.0                    |
| Cyclohex-<br>ane                    | C <sub>6</sub> H <sub>12</sub>                               | 84.16                                       | 6 | 12 | / | / | /  | / | 0.2                   | 0.0                     | 2.0                    |
| Benzene                             | C <sub>6</sub> H <sub>6</sub>                                | 78.11                                       | 6 | 6  | / | / | /  | / | 2.7                   | 0.0                     | 2.3                    |
| Toluene                             | C <sub>6</sub> H <sub>6</sub> -CH <sub>3</sub>               | 92.14                                       | 6 | 9  | / | / | /  | / | 2.4                   | 0.4                     | 2.4                    |
| 1,4-diox-<br>ane                    | C <sub>4</sub> H <sub>8</sub> O <sub>2</sub>                 | 88.11                                       | 4 | 8  | 2 | / | /  | / | 4.8                   | 0.5                     | 2.3                    |
| Chloro-<br>form                     | CHCl <sub>3</sub>                                            | 119.38                                      | 1 | /  | / | / | 3  | / | 4.8                   | 1.0                     | 4.8                    |
| Diethyl<br>ether                    | (C <sub>2</sub> H <sub>5</sub> ) <sub>2</sub> O <sub>2</sub> | 74.12                                       | 4 | 10 | 2 | / | /  | / | 2.8                   | 1.2                     | 4.3                    |
| Dichloro-<br>methane                | CH <sub>2</sub> Cl <sub>2</sub>                              | 84.93                                       | 1 | 2  | / | / | 2  | / | 3.1                   | 1.6                     | 9.1                    |
| THF                                 | C <sub>4</sub> H <sub>8</sub> O                              | 72.11                                       | 4 | 8  | 1 | / | /  | / | 4.0                   | 1.8                     | 7.5                    |
| Ethyl ace-<br>tate                  | C <sub>4</sub> H <sub>8</sub> O <sub>2</sub>                 | 88.11                                       | 4 | 8  | 2 | / | /  | / | 4.4                   | 1.8                     | 6.0                    |
| Acetone                             | (CH <sub>3</sub> ) <sub>2</sub> CO                           | 58.08                                       | 3 | 6  | 1 | / | /  | / | 5.1                   | 2.9                     | 20.7                   |
| Acetoni-<br>trile                   | CH <sub>3</sub> CN                                           | 41.05                                       | 2 | 3  | / | 1 | /  | / | 5.8                   | 4.0                     | 37.5                   |
| DMSO                                | (CH <sub>3</sub> ) <sub>2</sub> SO                           | 78.13                                       | 2 | 6  | 1 | / | /  | 1 | 7.2                   | 4.0                     | 46.5                   |
| Formic<br>acid                      | HCO <sub>2</sub> H                                           | 46.03                                       | 1 | 2  | 2 | / | /  | / | 6.0                   | 1,4                     | 58.0                   |
| <i>n</i> -Butanol                   | C <sub>4</sub> H <sub>9</sub> OH                             | 74.12                                       | 4 | 10 | 1 | / | /  | / | 3.9                   | 1,4                     | 58.0                   |
| <i>n</i> -Propa-<br>nol             | C <sub>3</sub> H <sub>8</sub> O                              | 60.10                                       | 3 | 8  | 1 | / | /  | / | 3.9                   | 1.6                     | 20.3                   |
| EtOH                                | C <sub>2</sub> H <sub>6</sub> O                              | 46.07                                       | 2 | 6  | 1 | / | /  | / | 5.2                   | 1.7                     | 24.3                   |

|                  |                                   |       |   |   |   |   |   |   |      |     |      |
|------------------|-----------------------------------|-------|---|---|---|---|---|---|------|-----|------|
| MeOH             | CH <sub>3</sub> OH                | 32.04 | 1 | 4 | 1 | / | / | / | 5.1  | 1.7 | 32.6 |
| Acetic<br>acid   | CH <sub>3</sub> CO <sub>2</sub> H | 60.05 | 2 | 4 | 2 | / | / | / | 6.0  | 1.7 | 6.2  |
| H <sub>2</sub> O | H <sub>2</sub> O                  | 18.02 | / | 2 | 1 | / | / | / | 10.2 | 1.9 | 78.5 |

**Table S2.** Experimentally measured peak height at 1696 cm<sup>-1</sup> for FF in different solvents at different temperatures.

| Solvent                   | <i>c</i> | 0       | 20     | 50     | 100    | 200    |
|---------------------------|----------|---------|--------|--------|--------|--------|
| Acetone                   | 25 °C    | 0.0000  | 0.0434 | 0.0986 | 0.1697 | 0.2686 |
|                           | 0 °C     | 0.0000  | 0.0372 | 0.1055 | 0.1757 | 0.2766 |
|                           | -10 °C   | 0.0000  | 0.0608 | 0.1181 | 0.1886 | 0.3088 |
| Acetonitrile <sup>a</sup> | 25 °C    | 0.0009  | 0.0502 | 0.1104 | 0.1969 | 0.3223 |
|                           | 0 °C     | 0.0009  | 0.0576 | 0.1185 | 0.2039 | 0.3265 |
|                           | -10 °C   | 0.0025  | 0.0546 | 0.1082 | 0.2042 | 0.3248 |
| Dichloromethane           | 25 °C    | -0.0102 | 0.0597 | 0.1432 | 0.2475 | 0.3961 |
|                           | 0 °C     | 0.0024  | 0.0698 | 0.1627 | 0.2611 | 0.4033 |
|                           | -10 °C   | -0.0086 | 0.0811 | 0.1822 | 0.2786 | 0.4153 |
| Diethyl ether             | 25 °C    | 0.0019  | 0.0308 | 0.1091 | 0.2379 | 0.4044 |
|                           | 0 °C     | 0.0062  | 0.0525 | 0.1607 | 0.3180 | 0.4935 |
|                           | -10 °C   | 0.0048  | 0.1015 | 0.3094 | 0.4922 | 0.6278 |
| EtOAc                     | 25 °C    | 0.0000  | 0.0466 | 0.1236 | 0.2085 | 0.3482 |
|                           | 0 °C     | 0.0000  | 0.0499 | 0.1322 | 0.2191 | 0.3533 |
|                           | -10 °C   | 0.0000  | 0.0485 | 0.1283 | 0.2147 | 0.3431 |
| EtOH                      | 25 °C    | 0.0088  | 0.0455 | 0.0984 | 0.1697 | 0.2828 |
|                           | 0 °C     | 0.0036  | 0.0509 | 0.1070 | 0.1824 | 0.2946 |
|                           | -10 °C   | 0.0085  | 0.0521 | 0.1091 | 0.1843 | 0.2913 |
| H <sub>2</sub> O          | 25 °C    | 0.0365  | 0.1981 | 0.2511 | 0.3000 | /      |

<sup>a</sup>Total solubility was taken as the average of all three measurements.**Table S3.** Experimentally measured peak height at 1696 cm<sup>-1</sup> for FF in different solvents at different temperatures.

| Solvent            | <i>c</i> | 0       | 20     | 50     | 100    | 200    |
|--------------------|----------|---------|--------|--------|--------|--------|
| MeOH               | 25 °C    | 0.0155  | 0.0461 | 0.0893 | 0.1542 | 0.2578 |
|                    | 0 °C     | 0.0236  | 0.0577 | 0.1032 | 0.1700 | 0.2729 |
|                    | -10 °C   | 0.0200  | 0.0570 | 0.1050 | 0.1752 | 0.2753 |
| <i>n</i> -Butanol  | 25 °C    | 0.0122  | 0.0544 | 0.1104 | 0.1923 | 0.3094 |
|                    | 0 °C     | 0.0136  | 0.0554 | 0.1168 | 0.2004 | 0.3191 |
|                    | -10 °C   | 0.0155  | 0.0583 | 0.1207 | 0.2025 | 0.3214 |
| <i>n</i> -Propanol | 25 °C    | 0.0196  | 0.0570 | 0.1095 | 0.1839 | 0.3000 |
|                    | 0 °C     | 0.0193  | 0.0609 | 0.1136 | 0.1918 | 0.3123 |
|                    | -10 °C   | 0.0224  | 0.0621 | 0.1164 | 0.1917 | 0.3058 |
| THF                | 25 °C    | -0.0142 | 0.0308 | 0.1091 | 0.2379 | 0.4044 |
|                    | 0 °C     | 0.0028  | 0.0731 | 0.1650 | 0.2828 | 0.4403 |
|                    | -10 °C   | 0.0045  | 0.0860 | 0.1827 | 0.2734 | 0.4538 |
| Toluene            | 25 °C    | 0.0229  | 0.0981 | 0.2049 | 0.3435 | 0.5114 |
|                    | 0 °C     | 0.0118  | 0.1075 | 0.2282 | 0.3643 | 0.5089 |
|                    | -10 °C   | 0.0094  | 0.1160 | 0.2033 | 0.3231 | 0.4453 |
| Benzene            | 25 °C    | 0.0009  | 0.0912 | 0.1986 | 0.3317 | 0.4936 |
| DMSO               | 25 °C    | 0.0061  | 0.0914 | 0.2011 | 0.3344 | 0.5413 |
| 1,4-dioxane        | 25 °C    | -0.0080 | 0.0591 | 0.1353 | 0.2413 | 0.4046 |



**Table S4.** Experimentally measured peak height at 1720 cm<sup>-1</sup> for LA in different solvents at different temperatures.

| Solvent         | c      | 0       | 20     | 50     | 100    | 200    |
|-----------------|--------|---------|--------|--------|--------|--------|
| Acetone         | 25 °C  | -0.0063 | 0.0345 | 0.0959 | 0.1822 | 0.3105 |
|                 | 0 °C   | -0.0065 | 0.0382 | 0.1072 | 0.1989 | 0.4046 |
|                 | -10 °C | -0.0111 | 0.0376 | 0.1066 | 0.2004 | 0.4192 |
| Acetonitrile    | 25 °C  | -0.0004 | 0.0463 | 0.1245 | 0.2289 | 0.4050 |
|                 | 0 °C   | -0.0082 | 0.0424 | 0.1332 | 0.2446 | 0.4241 |
|                 | -10 °C | 0.0016  | 0.0528 | 0.1458 | 0.2675 | 0.4510 |
| Dichloromethane | 25 °C  | 0.0000  | 0.0962 | 0.2063 | 0.3280 | 0.4887 |
|                 | 0 °C   | -0.0040 | 0.1178 | 0.2194 | 0.3486 | 0.5118 |
|                 | -10 °C | 0.0027  | 0.1241 | 0.2227 | 0.3486 | 0.5128 |
| Diethyl ether   | 25 °C  | -0.0081 | 0.0948 | 0.2052 | 0.3214 | 0.4960 |
|                 | 0 °C   | -0.0005 | 0.0886 | 0.1985 | 0.3196 | 0.4826 |
|                 | -10 °C | 0.0143  | 0.0997 | 0.2077 | 0.3432 | 0.5188 |
| EtOAc           | 25 °C  | 0.0000  | 0.0600 | 0.1318 | 0.2249 | 0.3627 |
|                 | 0 °C   | 0.0000  | 0.0616 | 0.1516 | 0.2356 | 0.3719 |
|                 | -10 °C | 0.0000  | 0.1216 | 0.1958 | 0.2830 | 0.4090 |
| EtOH            | 25 °C  | 0.0075  | 0.0575 | 0.1178 | 0.1877 | 0.3216 |
|                 | 0 °C   | 0.0085  | 0.0580 | 0.1182 | 0.1845 | 0.2626 |
|                 | -10 °C | 0.0069  | 0.0567 | 0.1253 | 0.2053 | 0.3979 |

**Table S5.** Experimentally measured peak height at 1720 cm<sup>-1</sup> for LA in different solvents at different temperatures.

| Solvent            | c      | 0       | 20     | 50             | 100    | 200    |
|--------------------|--------|---------|--------|----------------|--------|--------|
| MeOH               | 25 °C  | 0.0155  | 0.0520 | 0.1078         | 0.1832 | 0.2976 |
|                    | 0 °C   | 0.0236  | 0.0510 | 0.1059         | 0.1846 | 0.3000 |
|                    | -10 °C | 0.0200  | 0.0541 | 0.1001         | 0.1871 | 0.3017 |
| <i>n</i> -Butanol  | 25 °C  | 0.0101  | 0.0680 | 0.1377         | 0.2294 | 0.3685 |
|                    | 0 °C   | 0.0188  | 0.0697 | 0.1402         | 0.2334 | 0.3875 |
|                    | -10 °C | 0.0129  | 0.0609 | 0.1317         | 0.2253 | 0.3644 |
| <i>n</i> -Propanol | 25 °C  | 0.0126  | 0.0633 | 0.1368         | 0.2220 | 0.3612 |
|                    | 0 °C   | 0.0145  | 0.0564 | 0.1380         | 0.2629 | 0.3823 |
|                    | -10 °C | 0.0161  | 0.0653 | 0.1504         | 0.2565 | 0.3734 |
| THF                | 25 °C  | 0.0028  | 0.0466 | 0.1107         | 0.1984 | 0.3542 |
|                    | 0 °C   | 0.0020  | 0.0559 | 0.1352         | 0.2350 | 0.4068 |
|                    | -10 °C | 0.0008  | 0.0750 | 0.1570         | 0.2754 | 0.4518 |
| Toluene            | 25 °C  | 0.0050  | 0.1223 | 0.2246         | 0.3365 | 0.4950 |
|                    | 0 °C   | 0.0024  | 0.1133 | 0.2363         | 0.3627 | 0.5065 |
|                    | -10 °C | 0.0074  | 0.1145 | 0.4956         | 0.5270 | 0.6592 |
| Benzene            | 25 °C  | -0.0255 | 0.1280 | 0.2408         | 0.3738 | 0.5196 |
| DMSO               | 25 °C  | 0.0077  | 0.0866 | 0.1787         | 0.2800 | 0.4315 |
| 1,4-dioxane        | 25 °C  | 0.0092  | 0.0591 | 0.1353         | 0.2413 | 0.4046 |
| H <sub>2</sub> O   | 25 °C  |         |        | <i>no data</i> |        |        |

**Table S6.** Experimentally measured peak height at 1673 cm<sup>-1</sup> for HMF in different solvents at different temperatures.

| Solvent         | c     | 0      | 20     | 50               | 100    | 200    |
|-----------------|-------|--------|--------|------------------|--------|--------|
| Acetone         | 25°C  | 0.0000 | 0.0317 | 0.0764           | 0.1441 | 0.2747 |
|                 | 0°C   | 0.0000 | 0.0368 | 0.0935           | 0.1669 | 0.3160 |
|                 | -10°C | 0.0000 | 0.0441 | 0.1026           | 0.1906 | 0.3430 |
| Acetonitrile    | 25°C  | 0.0038 | 0.0363 | 0.0800           | 0.1549 | 0.2923 |
|                 | 0°C   | 0.0023 | 0.0151 | 0.0692           | 0.1534 | 0.3038 |
|                 | -10°C | 0.0016 | 0.0499 | 0.0994           | 0.1863 | 0.3328 |
| Dichloromethane | 25°C  | 0.0207 | 0.0847 | 0.1591           | 0.2649 | 0.4171 |
|                 | 0°C   | 0.0257 | 0.0885 | 0.1696           | 0.3004 | 0.4344 |
|                 | -10°C | 0.0274 | 0.0871 | 0.2146           | 0.3176 | 0.4813 |
| Diethyl ether   | 25°C  |        |        |                  |        |        |
|                 | 0°C   |        |        | <i>insoluble</i> |        |        |
|                 | -10°C |        |        |                  |        |        |
| EtOAc           | 25°C  | 0.0000 | 0.0691 | 0.1351           | 0.2341 | 0.3586 |
|                 | 0°C   | 0.0000 | 0.0495 | 0.0737           | 0.1507 | 0.2824 |
|                 | -10°C | 0.0000 | 0.0425 | 0.0692           | 0.0953 | 0.1634 |
| EtOH            | 25°C  | 0.0101 | 0.0542 | 0.1171           | 0.1867 | 0.3253 |
|                 | 0°C   | 0.0196 | 0.0650 | 0.1274           | 0.2026 | 0.3361 |
|                 | -10°C | 0.0010 | 0.0624 | 0.1224           | 0.1948 | 0.3082 |

**Table S7.** Experimentally measured peak height at 1673 cm<sup>-1</sup> for HMF in different solvents at different temperatures.

| Solvent            | c     | 0       | 20     | 50               | 100    | 200    |
|--------------------|-------|---------|--------|------------------|--------|--------|
| MeOH               | 25°C  | 0.0062  | 0.0232 | 0.0425           | 0.0596 | 0.1287 |
|                    | 0°C   | 0.0030  | 0.0535 | 0.1015           | 0.1753 | 0.2977 |
|                    | -10°C | -0.0004 | 0.0293 | 0.0680           | 0.0985 | 0.1533 |
| <i>n</i> -Butanol  | 25°C  | 0.0176  | 0.0502 | 0.1291           | 0.2199 | 0.3510 |
|                    | 0°C   | 0.0189  | 0.0525 | 0.1405           | 0.2317 | 0.3504 |
|                    | -10°C | 0.0115  | 0.0377 | 0.1070           | 0.2099 | 0.3390 |
| <i>n</i> -Propanol | 25°C  | 0.0238  | 0.0707 | 0.1340           | 0.2228 | 0.3529 |
|                    | 0°C   | 0.0330  | 0.0905 | 0.1579           | 0.2466 | 0.3700 |
|                    | -10°C | 0.0322  | 0.0897 | 0.1571           | 0.2624 | 0.3842 |
| THF                | 25°C  | 0.0080  | 0.0237 | 0.0447           | 0.1015 | 0.2185 |
|                    | 0°C   | 0.0162  | 0.0412 | 0.0809           | 0.1397 | 0.2965 |
|                    | -10°C | 0.0208  | 0.0871 | 0.2146           | 0.3176 | 0.4813 |
| Toluene            | 25°C  |         |        |                  |        |        |
|                    | 0°C   |         |        | <i>insoluble</i> |        |        |
|                    | -10°C |         |        |                  |        |        |
| Benzene            | 25°C  |         |        | <i>insoluble</i> |        |        |
| DMSO               | 25°C  | 0.0139  | 0.0901 | 0.1961           | 0.3195 | 0.4922 |
| 1,4-dioxane        | 25°C  | 0.0097  | 0.1662 | 0.3110           | 0.3904 | 0.4218 |
| H <sub>2</sub> O   | 25°C  | 0.0007  | 0.1662 | 0.3110           | 0.3904 | 0.4218 |

**Table S8.** The table contains the correlation factors (A and B from Eq. (1), in section 3.4 of the main text) and max solubility for FF at different temperatures and in different solvents.

| Solvent          | Temperature |       |            |       |       |            |       |       |            |
|------------------|-------------|-------|------------|-------|-------|------------|-------|-------|------------|
|                  | -10 °C      |       |            | 0 °C  |       |            | 25 °C |       |            |
|                  | A           | B     | Solubility | A     | B     | Solubility | A     | B     | Solubility |
| Benzene          | /           | /     | /          | /     | /     | /          | 0.637 | 0.008 | 566        |
| Toluene          | 0.499       | 0.011 | 426        | 0.594 | 0.010 | 478        | 0.657 | 0.008 | 614        |
| 1,4-Dioxane      | /           | /     | /          | /     | /     | /          | 0.718 | 0.004 | 1113       |
| Diethyl ether    | 0.717       | 0.011 | 423        | 0.848 | 0.004 | 1042       | 1.235 | 0.002 | 2302*      |
| Dichloro-methane | 0.506       | 0.008 | 547        | 0.537 | 0.007 | 669        | 0.606 | 0.005 | 871        |
| THF              | 0.628       | 0.006 | 735        | 0.625 | 0.006 | 758        | 1.235 | 0.002 | 2302*      |
| EtOAc            | 0.516       | 0.005 | 845        | 0.536 | 0.005 | 860        | 0.589 | 0.004 | 1032       |
| Acetone          | 0.436       | 0.006 | 760        | 0.407 | 0.006 | 809        | 0.396 | 0.006 | 813        |
| Acetonitrile     | 0.516       | 0.005 | 926        | 0.482 | 0.006 | 820        | 0.529 | 0.005 | 982        |
| DMSO             | /           | /     | /          | /     | /     | /          | 0.801 | 0.006 | 824        |
| n-Butanol        | 0.455       | 0.006 | 759        | 0.467 | 0.006 | 805        | 0.466 | 0.005 | 848        |
| n-Propanol       | 0.420       | 0.006 | 719        | 0.457 | 0.006 | 810        | 0.441 | 0.006 | 818        |
| EtOH             | 0.413       | 0.006 | 760        | 0.441 | 0.005 | 839        | 0.465 | 0.005 | 989        |
| MeOH             | 0.372       | 0.007 | 692        | 0.375 | 0.006 | 722        | 0.416 | 0.005 | 961        |

\*Fully miscible. <sup>a</sup>Total solubility was taken as the average of all three measurements.

**Table S9.** Correlation factors and max solubility for LA at different temperatures and in different solvents.

| Solvent          | Temperature |       |            |        |       |            |       |       |            |
|------------------|-------------|-------|------------|--------|-------|------------|-------|-------|------------|
|                  | -10 °C      |       |            | 0 °C   |       |            | 25 °C |       |            |
|                  | A           | B     | Solubility | A      | B     | Solubility | A     | B     | Solubility |
| Benzene          | /           | /     | /          | /      | /     | /          | 0.585 | 0.011 | 433        |
| Toluene          | 0.672       | 0.018 | 251        | 0.577  | 0.010 | 448        | 0.569 | 0.010 | 471        |
| 1,4-Dioxane      | /           | /     | /          | /      | /     | /          | 0.616 | 0.005 | 1017       |
| Diethyl ether    | 0.672       | 0.007 | 629        | 0.620  | 0.007 | 617        | 0.639 | 0.007 | 624        |
| Dichloro-methane | 0.604       | 0.009 | 501        | 0.611  | 0.009 | 518        | 0.607 | 0.008 | 572        |
| THF              | 0.722       | 0.005 | 942        | 0.786  | 0.004 | 1269*      | 0.821 | 0.003 | 1636*      |
| EtOAc            | 0.444       | 0.012 | 397        | 0.503  | 0.007 | 694        | 0.547 | 0.005 | 851        |
| Acetone          | 351.197     | 0.000 | 777810*    | 18.765 | 0.000 | 42361*     | 0.681 | 0.003 | 1507*      |
| Acetonitrile     | 0.892       | 0.004 | 1304*      | 0.979  | 0.003 | 1618*      | 0.990 | 0.003 | 1751*      |
| DMSO             | /           | /     | /          | /      | /     | /          | 0.550 | 0.008 | 611        |

|                    |       |       |       |       |       |     |       |       |     |
|--------------------|-------|-------|-------|-------|-------|-----|-------|-------|-----|
| <i>n</i> -Butanol  | 0.552 | 0.005 | 858   | 0.594 | 0.005 | 881 | 0.528 | 0.006 | 778 |
| <i>n</i> -Propanol | 0.479 | 0.008 | 608   | 0.536 | 0.006 | 725 | 0.524 | 0.006 | 798 |
| EtOH               | 1.175 | 0.002 | 2245* | 0.306 | 0.010 | 479 | 0.508 | 0.005 | 932 |
| MeOH               | 0.481 | 0.005 | 936   | 0.465 | 0.005 | 893 | 0.447 | 0.005 | 848 |

\*Fully miscible.

**Table S10.** Correlation factors and max solubility for HMF at different temperatures and in different solvents.

| Solvent            | Temperature |       |            |        |       |            |         |       |            |
|--------------------|-------------|-------|------------|--------|-------|------------|---------|-------|------------|
|                    | -10 °C      |       |            | 0 °C   |       |            | 25 °C   |       |            |
|                    | A           | B     | Solubility | A      | B     | Solubility | A       | B     | Solubility |
| 1,4-Dioxane        | /           | /     | /          | /      | /     | /          | 2.242   | 0.001 | 7039*      |
| Dichloro-methane   | 0.593       | 0.008 | 562        | 0.551  | 0.008 | 592        | 0.567   | 0.007 | 701        |
| THF                | 0.593       | 0.008 | 563        | 70.683 | 0.000 | 220011*    | 263.337 | 0.000 | 1134229*   |
| EtOAc              | 0.206       | 0.007 | 621        | 0.982  | 0.002 | 2725*      | 0.486   | 0.007 | 692        |
| Acetone            | 0.892       | 0.002 | 1899*      | 1.120  | 0.002 | 2786*      | 1.270   | 0.001 | 3783*      |
| Acetonitrile       | 0.755       | 0.003 | 1577*      | 36.775 | 0.000 | 111777*    | 1.237   | 0.001 | 3418*      |
| DMSO               | /           | /     | /          | /      | /     | /          | 0.653   | 0.007 | 664        |
| <i>n</i> -Butanol  | 0.639       | 0.004 | 1207       | 0.473  | 0.007 | 680        | 0.534   | 0.005 | 860        |
| <i>n</i> -Propanol | 0.468       | 0.008 | 543        | 0.441  | 0.009 | 523        | 0.485   | 0.006 | 716        |
| EtOH               | 0.409       | 0.007 | 671        | 0.486  | 0.006 | 795        | 0.546   | 0.004 | 1030       |
| MeOH               | 0.190       | 0.008 | 578        | 0.498  | 0.005 | 1020       | 0.466   | 0.002 | 2895*      |
| H <sub>2</sub> O   | /           | /     | /          | /      | /     | /          | 0.425   | 0.026 | 180        |

\*Fully miscible.

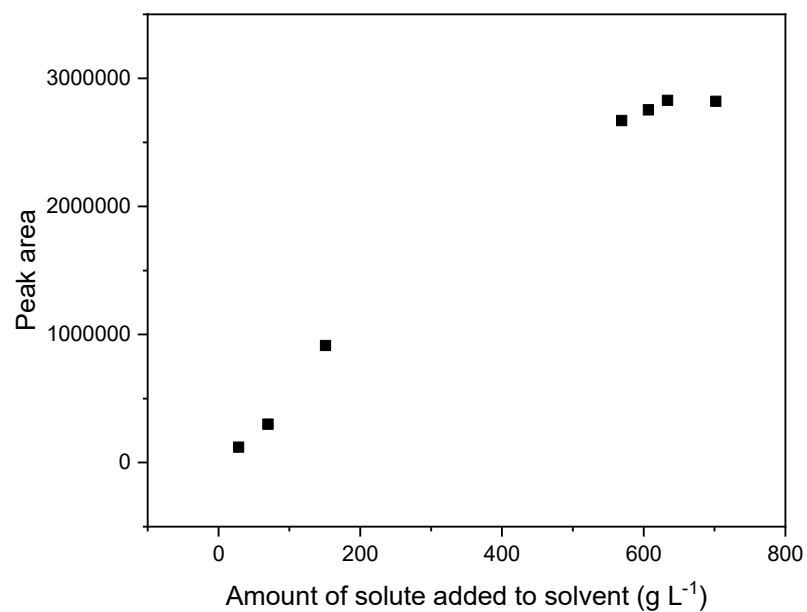

**Figure S5.** The validation experiment using GC/MS for furfural in benzene.

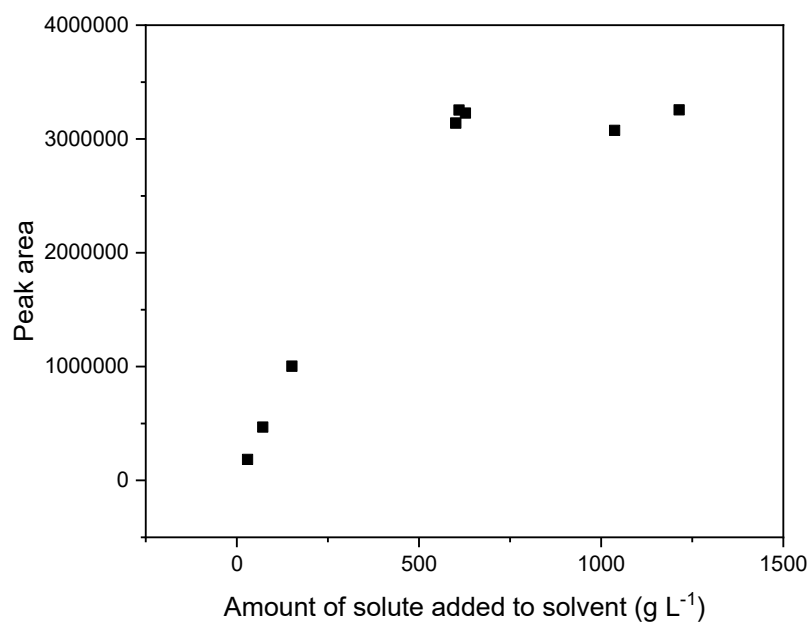

**Figure S6.** The validation experiment using GC/MS for levulinic acid in DMSO.

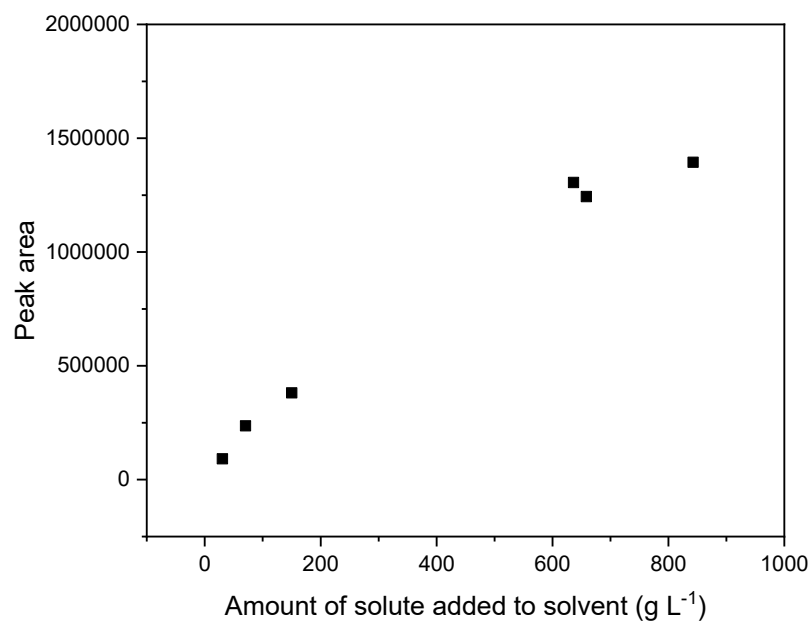

**Figure S7.** The validation experiment using GC/MS for HMF in EtOAc.

## References

B. Spangenberg, C.F. Poole, C. Weins, Quantitative Thin-Layer Chromatography, Springer: Berlin, Germany, 2011.
